# Supplementary material
Source: MDPI journal article supplement (https://www.mdpi.com/1996-1073/15/23/9211)
Supplement: s1 [file s1 › energies-2050805-supplementary.pdf]

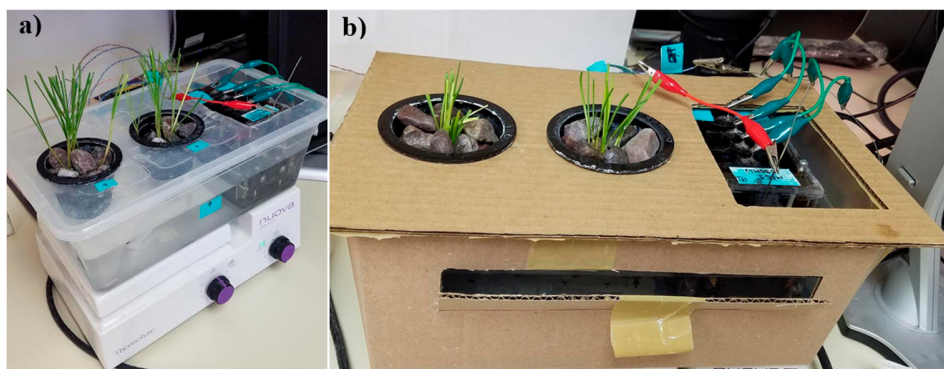

**Figure S1.** The MFC-HyP system: **a)** without a cover; **b)** with a cover

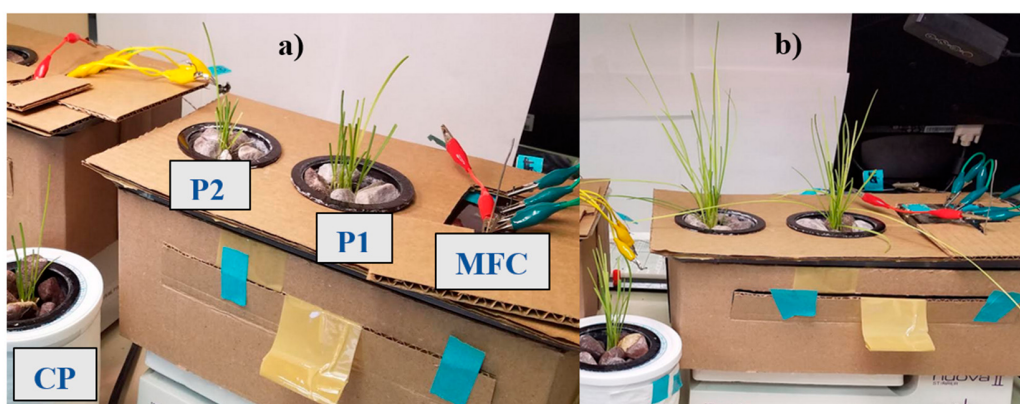

**Figure S2.** Pictorial view of control plant (CP), plant 1 (P1), and plant 2 (P2) in the MFC-HyP system: **a)** on the first day and **b)** after 28 days of operation

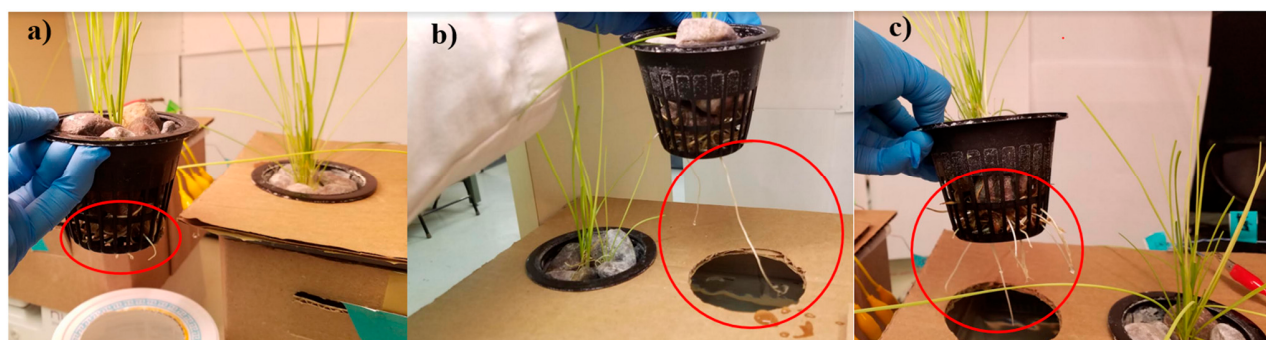

**Figure S3.** Pictorial view of roots from **a)** control plant (CP), **b)** plant 1 (P1), and **c)** plant 2 (P2)

**Table S1.** Concentrations of nutrients and COD in the MFC-Hyp system

|                                 | Conditions      | pH   | Ammonium (mg/L) | Nitrate (mg/L) | Phosphate (mg/L) | COD (mg/L)    |
|---------------------------------|-----------------|------|-----------------|----------------|------------------|---------------|
| <b>Control</b>                  | Feed wastewater | 7.24 | 5.5±0.16        | 29.5±0.1       | 3218±14.22       | 3036.17±13.01 |
|                                 | MFC at Day 28   | 6.92 | 64.76±1.08      | 20.97±0.02     | 2932.37±22.32    | 645.86±13.32  |
|                                 | Hyp at Day 28   | 8.36 | 0.1±0.01        | 7.93±0.14      | 33.28±0.06       | 14.29±0.16    |
| <b>With <i>A. tuberosum</i></b> | Feed wastewater | 7.2  | 6.6±0.62        | 32.39±0.17     | 3307.49±5.81     | 3429.64±56.62 |
|                                 | MFC at Day 28   | 6.85 | 41.34±3.74      | 22.12±0.01     | 2931.54±0.79     | 672.26±3.38   |
|                                 | Hyp at Day 28   | 8.05 | 0.08±0.004      | 7.55±0.11      | 42.88±0.2        | 19.97±3.22    |

**Table S2.** Total available mass of phosphate ( $m_T$ ), mass of phosphate present in the wastewater ( $m_{ww}$ ) and taken up by bacteria ( $m_b$ ) in the MFC, and in water ( $m_w$ ) and taken up by the plant ( $m_p$ ) in the Hyp vessel after the 28 days of operation.

| System              | $m_T$ (mg)  | $m_{ww}$ (mg) | $m_b$ (mg) | $m_w$ (mg) | $m_p$ (mg) |
|---------------------|-------------|---------------|------------|------------|------------|
| MFC-Hyp control     | 1705.5±7.54 | 1554.2±11.83  | 68.2±14.03 | 83.2±0.15  | 0          |
| MFC-Hyp with plants | 1753±3.08   | 1553.7±0.42   | 68.2±14.03 | 107.2±0.5  | 23.9±14.38 |
